# Supplementary material
Source: PubMed Central journal article supplement (PMC1383554)
Supplement: 7600973s2.pdf [file 7600973s2.pdf]

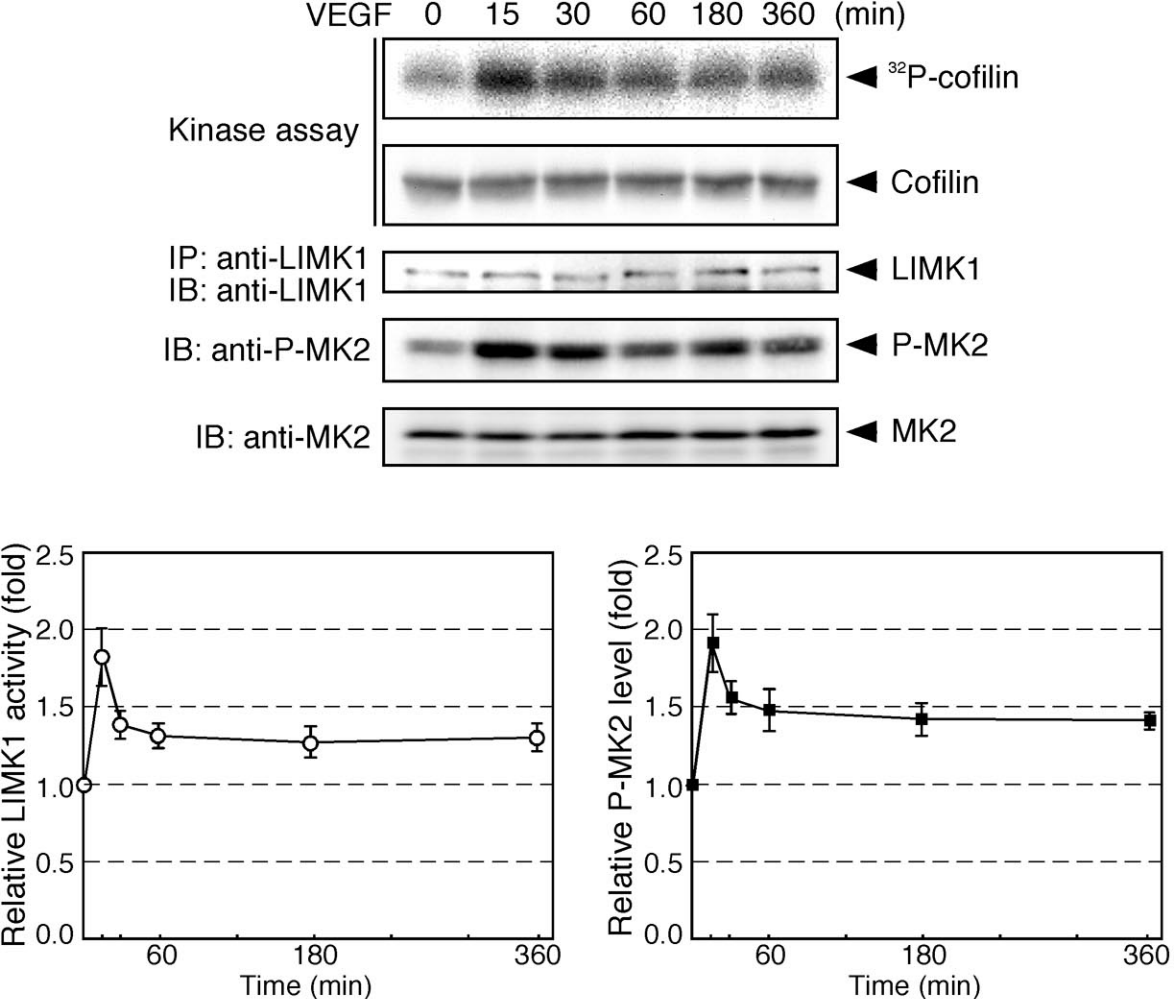

**Suppl. Fig. 2.** A prolonged time course of the changes in the kinase activity of LIMK1 and the level of phospho-MK2 (P-MK2). MSS31 cells were stimulated with VEGF. At the indicated times, cells were lysed and LIMK1 was immunoprecipitated with anti-LIMK1 antibody, and subjected to an *in vitro* kinase assay, using His<sub>6</sub>-cofilin as the substrate, as in Fig. 1A. The levels of P-MK2 were measured by immunoblotting with anti-P-MK2 antibody. The relative kinase activities of LIMK1 and the relative P-MK2 levels are plotted in the bottom panels. Data are means  $\pm$  SD of triplicate experiments.

**Materials.** An antibody against the Thr-334-phosphorylated MK2 (P-MK2) was purchased from Cell Signaling Technology.
