# Supplementary material
Source: PubMed Central journal article supplement (PMC1383554)
Supplement: 7600973s3.pdf [file 7600973s3.pdf]

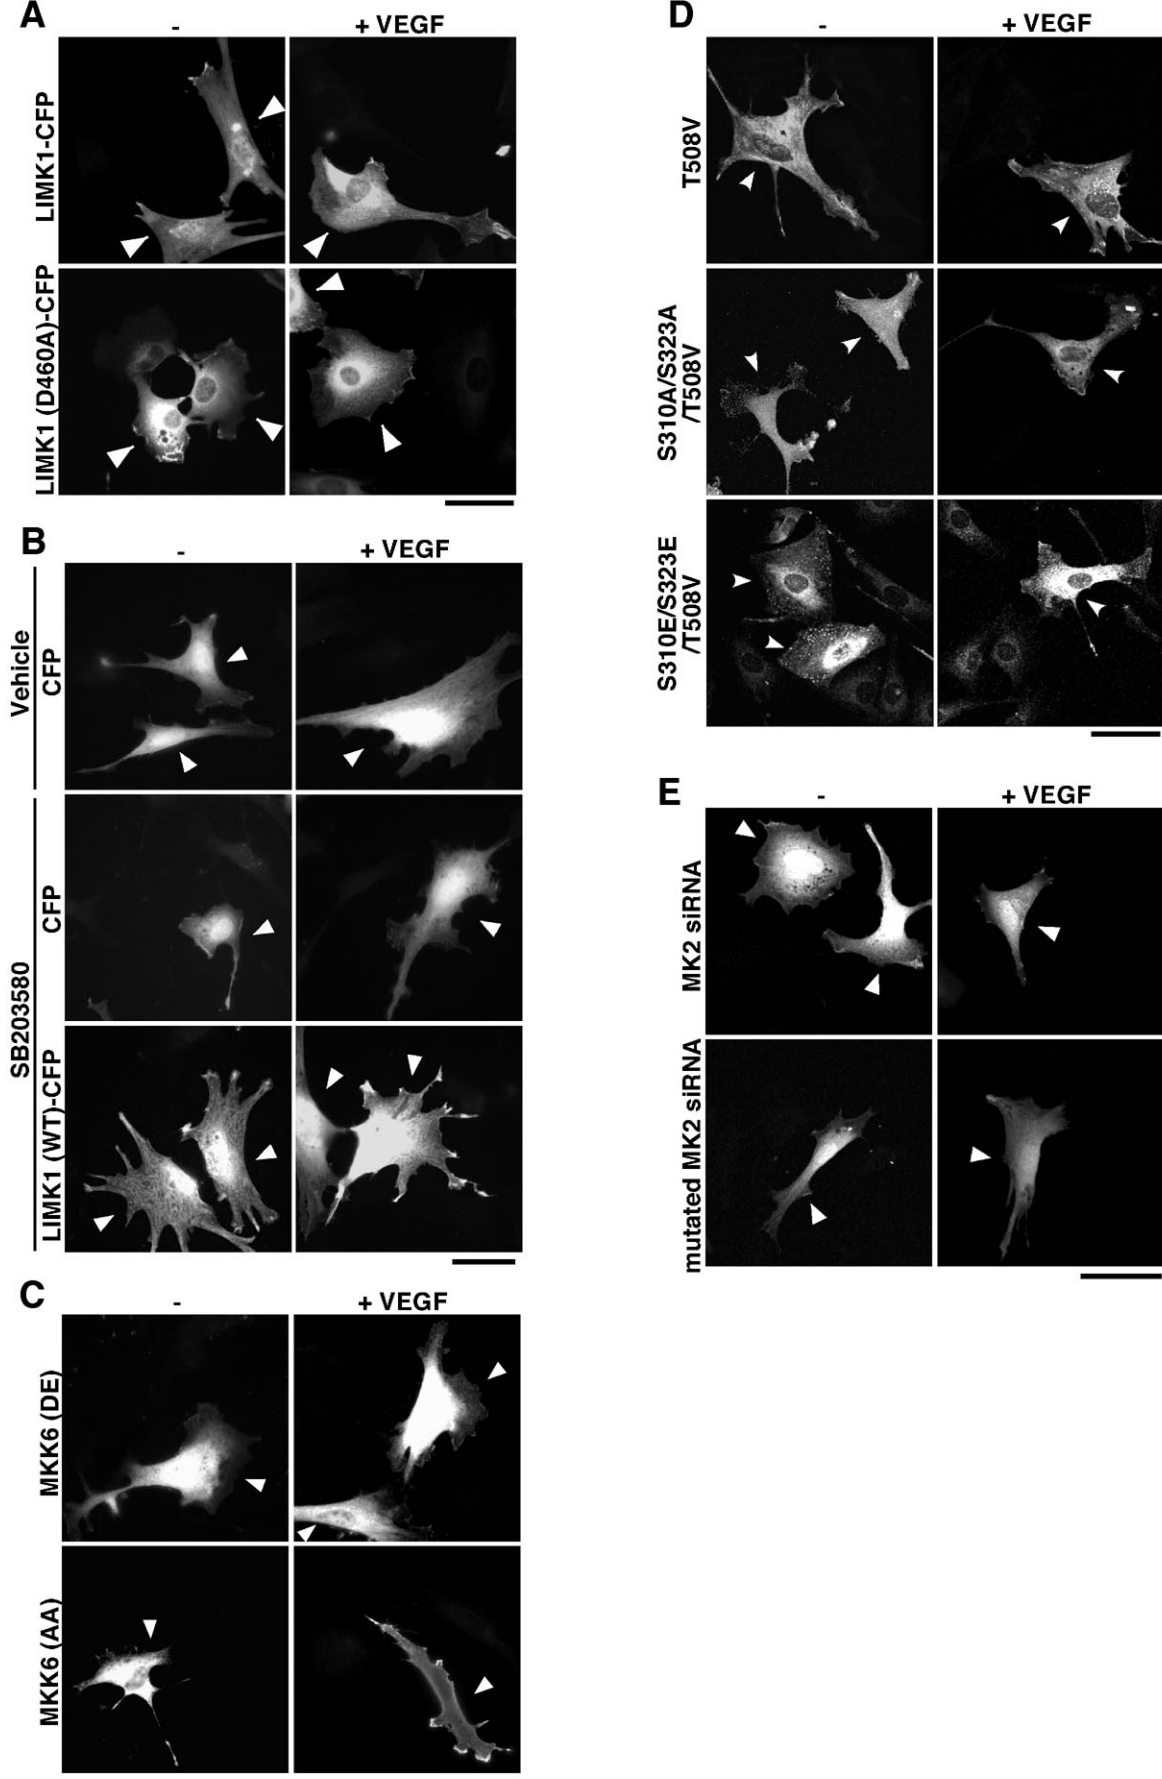

**Suppl. Fig. 3.** Fluorescence images to analyze the expression of CFP-, HA-, or Myc-tagged proteins or siRNA plasmids. (A) CFP fluorescence images of the cells in Fig. 2A. (B) CFP fluorescence images of the cells in Fig. 3C. (C) Anti-HA immunofluorescence images of the cells in Fig. 3E. (D) Anti-Myc immunofluorescence images of the cells in Fig. 7C. (E) YFP fluorescence images of the cells in Fig. 8C, to monitor the transfection of siRNA plasmids. Bar, 50  $\mu$ m.
