# Supplementary material
Source: PubMed Central journal article supplement (PMC1383554)
Supplement: 7600973s5.pdf [file 7600973s5.pdf]

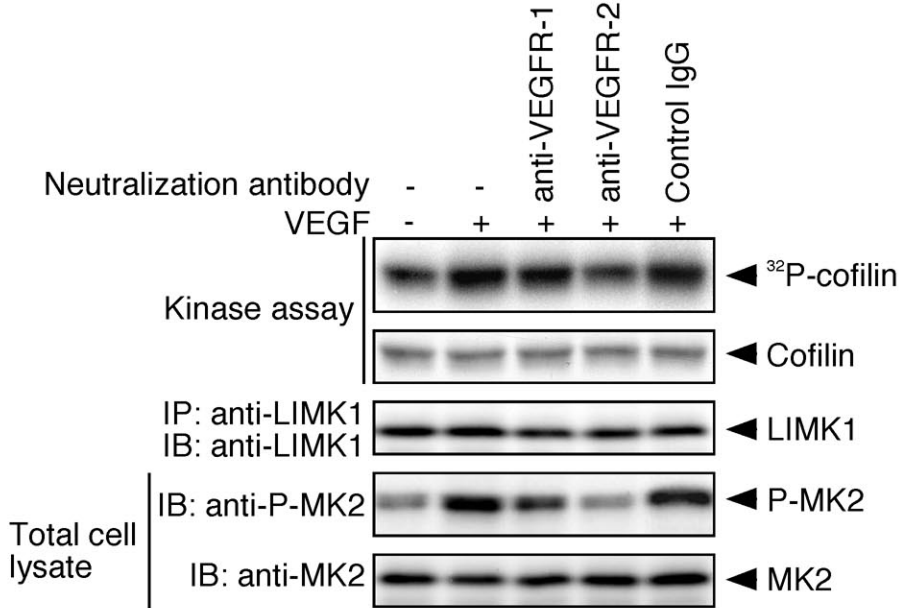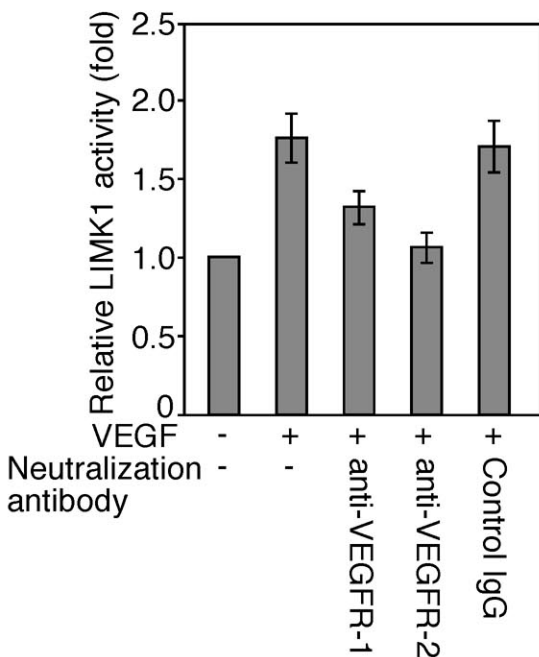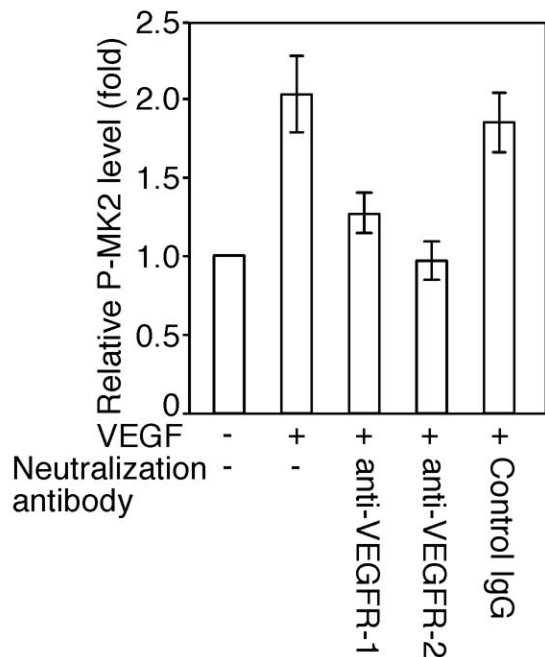

**Suppl. Fig. 5.** Both VEGFR-1 and VEGFR-2 are involved in VEGF-induced activation of MK2 and LIMK1. MSS31 cells were pretreated with the neutralizing antibody against VEGFR-1 or VEGFR-2 or control IgG, and then stimulated with VEGF for 15 min. Cells were lysed and LIMK1 was immunoprecipitated and subjected to an in vitro kinase assay. Cell lysates were also subjected to immuno blot analyses with anti-MK2 and anti-P-MK2 antibodies. Relative kinase activities of LIMK1 and relative P-MK2 levels are shown in the bottom panels, as means  $\pm$  SD of triplicate experiments.

**Materials.** The neutralizing anti-VEGFR-1 and anti-VEGFR-2 antibodies were purchased from R & D Systems.
