# Supplementary material
Source: PubMed Central journal article supplement (PMC1383554)
Supplement: 7600973s6.pdf [file 7600973s6.pdf]

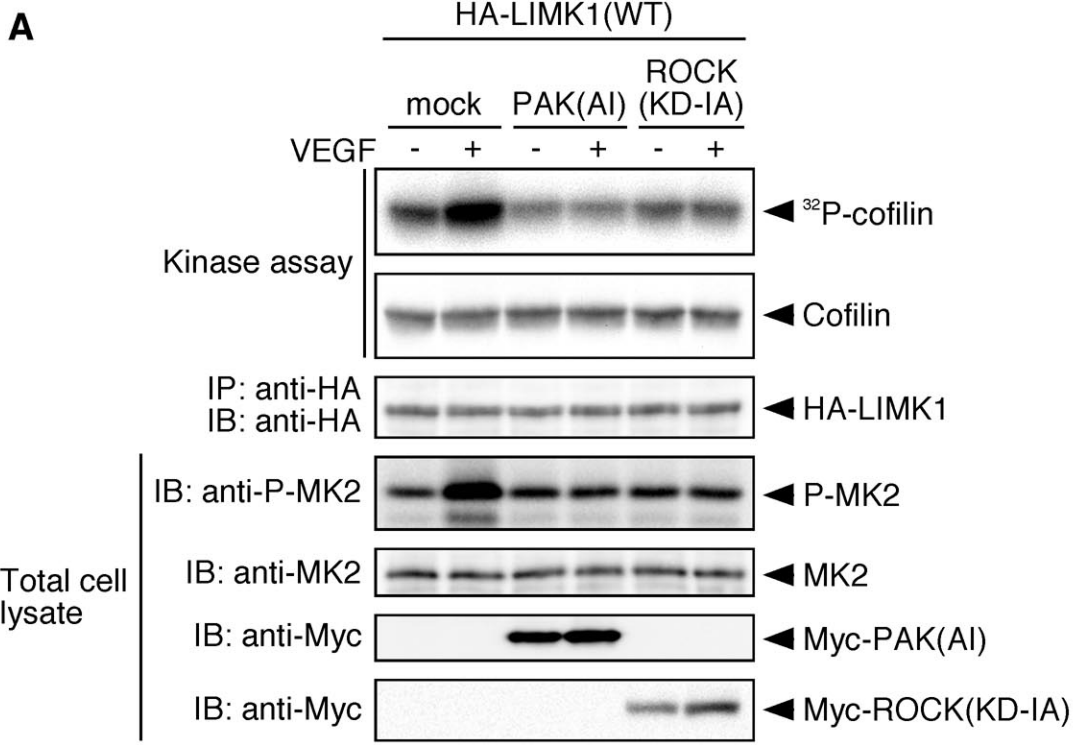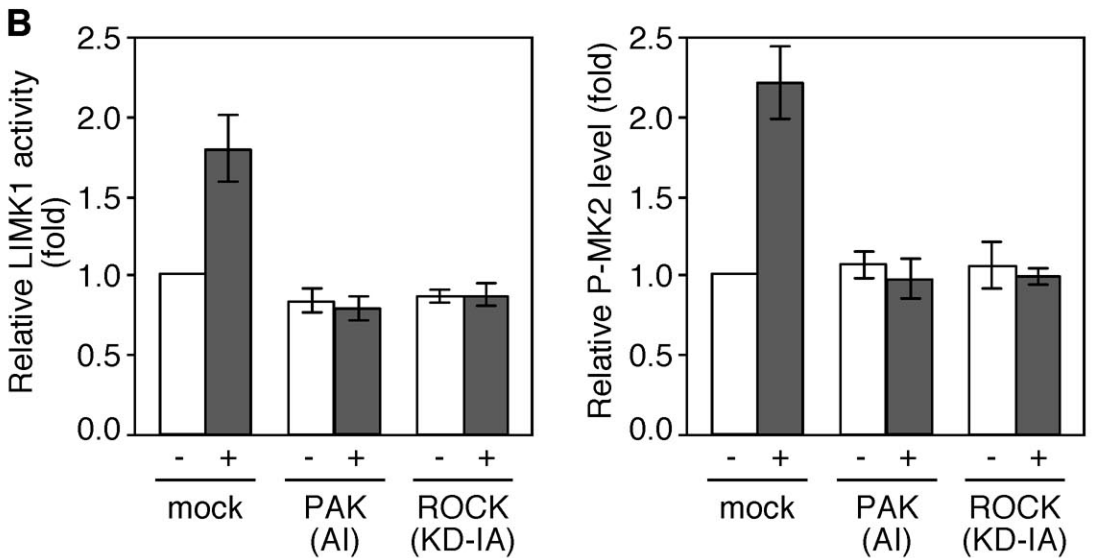

**Suppl. Fig. 6.** Both ROCK and PAK are involved in VEGF-induced activation of MK2 and LIMK1. MSS31 cells were cotransfected with plasmids for HA-LIMK1 and plasmids for a dominant-negative mutant of ROCK [ROCK(KD-IA)] (Ishizaki *et al.*, 1997) or an autoinhibitory domain of PAK3 [PAK(AI)] (Amano *et al.*, 2002). Cells were untreated or stimulated with VEGF for 15 min. HA-LIMK1 was immunoprecipitated and subjected to an *in vitro* kinase assay. The levels of P-MK2 were analyzed by immunoblotting with anti-P-MK2 antibody. Relative kinase activities of LIMK1 and relative P-MK2 levels are shown in the bottom panels, as means  $\pm$  SD of triplicate experiments.

References for Suppl. Fig. 6.

Amano T, Kaji N, Ohashi K, Mizuno K (2002) Mitosis-specific activation of LIM motif containing protein kinase and roles of cofilin phosphorylation and dephosphorylation in mitosis. *J Biol Chem* **277**: 22093-22102

Ishizaki T, Naito M, Fujisawa K, Maekawa M, Watanabe N, Saito Y, Narumiya S (1997) p160ROCK, a Rho-associated coiled-coil forming protein kinase, works downstream of Rho and induces focal adhesions. *FEBS Lett* **404**: 118-124
